# Supplementary material for: Modeling and Forecasting the Algiers Stock Exchange Returns using the Box-Jenkins Methodology<strong> </strong>
Source: Preprints.org preprint supplement (doi:10.20944/preprints201909.0134.v1), 2019-09-13
Supplement: Supplementary file 2 [file supplementary]

## Sheet: Sheet1
Date	Monthly Index	returns
2008-01-01	1004.67
2008-02-01	1020.22	0.00667128
2008-03-01	1020.22	0
2008-04-01	1017.11	-0.00132634
2008-05-01	1018.66	0.000663889
2008-06-01	992.224	-0.0114208
2008-07-01	1015.55	0.0100924
2008-08-01	992.224	-0.0100924
2008-09-01	992.224	0
2008-10-01	1000	0.00339027
2008-11-01	1018.66	0.00803053
2008-12-01	1010.89	-0.00332835
2009-01-01	1010.89	0
2009-02-01	1010.89	0
2009-03-01	1010.89	0
2009-04-01	1010.89	0
2009-05-01	1010.89	0
2009-06-01	1018.66	0.00332835
2009-07-01	1018.66	0
2009-08-01	1018.66	0
2009-09-01	1018.66	0
2009-10-01	1041.99	0.00983344
2009-11-01	1018.66	-0.00983344
2009-12-01	1018.66	0
2010-01-01	1041.99	0.00983344
2010-02-01	1041.99	0
2010-03-01	1049.77	0.00322895
2010-04-01	1049.77	0
2010-05-01	1073.1	0.00954525
2010-06-01	1119.75	0.0184833
2010-07-01	1150.86	0.0118991
2010-08-01	1150.86	0
2010-09-01	1150.86	0
2010-10-01	1150.86	0
2010-11-01	1197.51	0.0172593
2010-12-01	1228.62	0.0111363
2011-01-01	1290.82	0.0214509
2011-02-01	1306.38	0.00520116
2011-03-01	1382.84	0.0247041
2011-04-01	1385.31	0.000774095
2011-05-01	1454.37	0.0211295
2011-06-01	1458.48	0.00122587
2011-07-01	1458.48	0
2011-08-01	1454.37	-0.00122587
2011-09-01	1454.37	0
2011-10-01	1454.37	0
2011-11-01	1450.26	-0.00122934
2011-12-01	1450.26	0
2012-01-01	1438.75	-0.00346083
2012-02-01	1426.82	-0.00361645
2012-03-01	1426.82	0
2012-04-01	1372.55	-0.0168397
2012-05-01	1372.55	0
2012-06-01	1372.55	0
2012-07-01	1352	-0.00655307
2012-08-01	1323.22	-0.00934366
2012-09-01	1323.22	0
2012-10-01	1289.51	-0.0112073
2012-11-01	1289.51	0
2012-12-01	1289.51	0
2013-01-01	1289.51	0
2013-02-01	1289.51	0
2013-03-01	1289.51	0
2013-04-01	1273.07	-0.00557379
2013-05-01	1273.07	0
2013-06-01	1284.24	0.00379324
2013-07-01	1255	-0.0100008
2013-08-01	1258.42	0.00118327
2013-09-01	1258.42	0
2013-10-01	1164.37	-0.0337352
2013-11-01	1144	-0.00766762
2013-12-01	1073.89	-0.0274643
2014-01-01	1092.87	0.0076079
2014-02-01	1130.1	0.0145472
2014-03-01	1153.97	0.00907918
2014-04-01	1143.7	-0.00388392
2014-05-01	1157.41	0.0051785
2014-06-01	1147.08	-0.0038954
2014-07-01	1168.49	0.00803166
2014-08-01	1205.85	0.0136661
2014-09-01	1216.03	0.00365387
2014-10-01	1196.6	-0.00699709
2014-11-01	1194.81	-0.000650514
2014-12-01	1187.39	-0.00270474
2015-01-01	1209.92	0.00816292
2015-02-01	1194.6	-0.00553415
2015-03-01	1191.53	-0.00111534
2015-04-01	1188.59	-0.00107291
2015-05-01	1194.03	0.00198061
2015-06-01	1232.48	0.0137647
2015-07-01	1255.88	0.00816794
2015-08-01	1262.85	0.00240329
2015-09-01	1351.51	0.0294699
2015-10-01	1347.47	-0.00129951
2015-11-01	1319.11	-0.00923806
2015-12-01	1288.52	-0.0101925
2016-01-01	1264.66	-0.00811432
2016-02-01	1241.77	-0.00793504
2016-03-01	1238.17	-0.00125913
2016-04-01	1241.38	0.00112411
2016-05-01	1422.89	0.0592647
2016-06-01	1423.66	0.000236787
2016-07-01	1326.07	-0.0308391
2016-08-01	1341.09	0.00488854
2016-09-01	1298.8	-0.0139147
2016-10-01	1290.46	-0.00279673
2016-11-01	1289.24	-0.000409428
2016-12-01	1293.29	0.00135979
2017-01-01	1288.42	-0.00163846
2017-02-01	1291.49	0.00103494
2017-03-01	1279.62	-0.00401138
2017-04-01	1287.09	0.00252891
2017-05-01	1260.38	-0.00910637
2017-06-01	1294.78	0.0116924
2017-07-01	1302.69	0.00264643
2017-08-01	1300	-0.000899396
2017-09-01	1293.15	-0.00229345
2017-10-01	1261.75	-0.0106759
2017-11-01	1226.73	-0.0122222
2017-12-01	1203.21	-0.00841077
2018-01-01	1172.51	-0.0112253
2018-02-01	1134.03	-0.0144886
2018-03-01	1200.42	0.0247075
2018-04-01	1198.07	-0.000852478
2018-05-01	1206.7	0.00311713
2018-06-01	1263.37	0.0199327
2018-07-01	1355.67	0.0306218
2018-08-01	1426.67	0.022172
2018-09-01	1445.7	0.00575404
2018-10-01	1444.16	-0.000464673
2018-11-01	1470.18	0.00775758
2018-12-01	1407.35	-0.0189711
2019-01-01	1423.04	0.00481684
2019-02-01	1398.15	-0.00766396
2019-03-01	1391.18	-0.00217044
2019-04-01	1394.46	0.0010218
2019-05-01	1458.97	0.0196412
2019-06-01	1513.34	0.0158899
2019-07-01	1518.46	0.00146685
